# Supplementary material for: Electrochemical detection of 2-nitrophenol using a heterostructure ZnO/RuO2 nanoparticle modified glassy carbon electrode
Source: Royal Society of Chemistry journal article supplement (doi:10.1039/c9ra08669b), 2019-12-24
Supplement: c9ra08669b1.pdf [file c9ra08669b1.pdf]

## Development of electrochemical sensor based on ZnO/RuO<sub>2</sub> nanoparticle modified glassy carbon electrode for the detection of 2-nitrophenol

Md. Tamez Uddin,<sup>1</sup> Md. Mahmud Alam,<sup>1</sup> Abdulla Mohamed Asiri,<sup>2,3</sup> Mohammed Muzibur Rahman,<sup>2,3</sup> Thierry Toupance,<sup>4</sup> Md. Akhtarul Islam<sup>1</sup>

---

<sup>1</sup>**Corresponding author:** Dr. Md. Tamez Uddin

**Email:** [mtuddin\\_cep@yahoo.com](mailto:mtuddin_cep@yahoo.com)

**Tel.:** +880 821 717850, Ext 681; **Fax:** +880 821 715257

**16-digit ORCID:** 0000-0001-9235-1112

<sup>1</sup>Department of Chemical Engineering and Polymer Science, Shahjalal University of Science and Technology, Sylhet 3100, Bangladesh

<sup>2</sup>Chemistry Department, King Abdulaziz University, Faculty of Science, Jeddah 21589, P.O. Box 80203, Saudi Arabia.

<sup>3</sup>Center of Excellence for Advanced Material Research (CEAMR), King Abdulaziz University, Jeddah 21589, P.O. Box 80203, Saudi Arabia.

<sup>4</sup>Institut des Sciences Moléculaires, Univ. Bordeaux, UMR 5255 CNRS, 351 Cours de la Libération, F-33405 Talence Cédex, France.

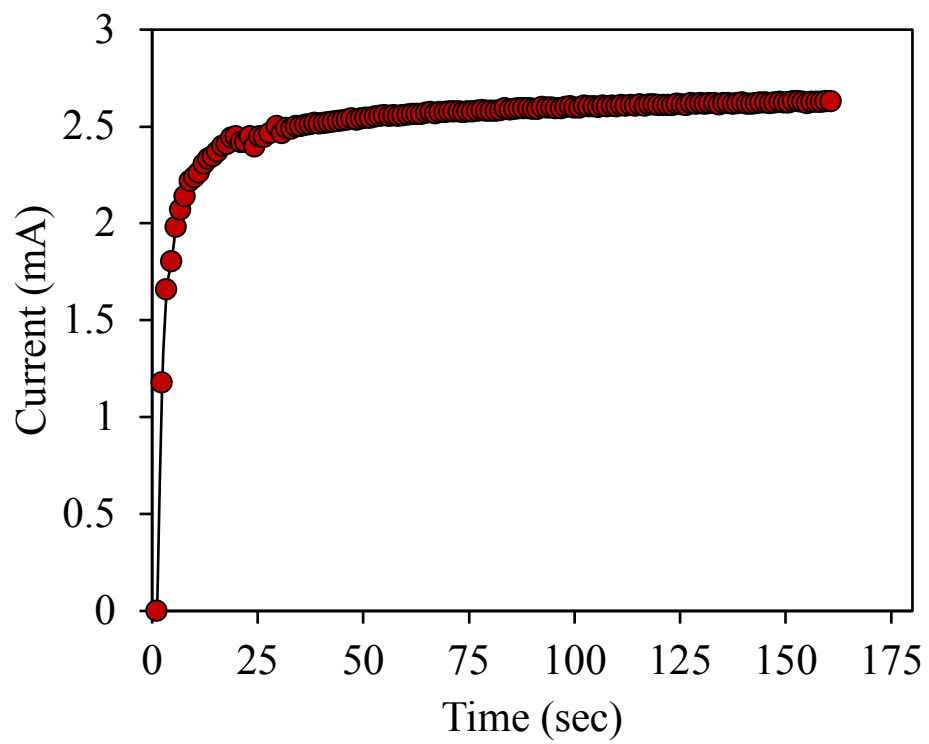

Figure S1. Response time of 2-NP chemical sensor based on ZnO/RuO<sub>2</sub> NPs/binder/GCE.

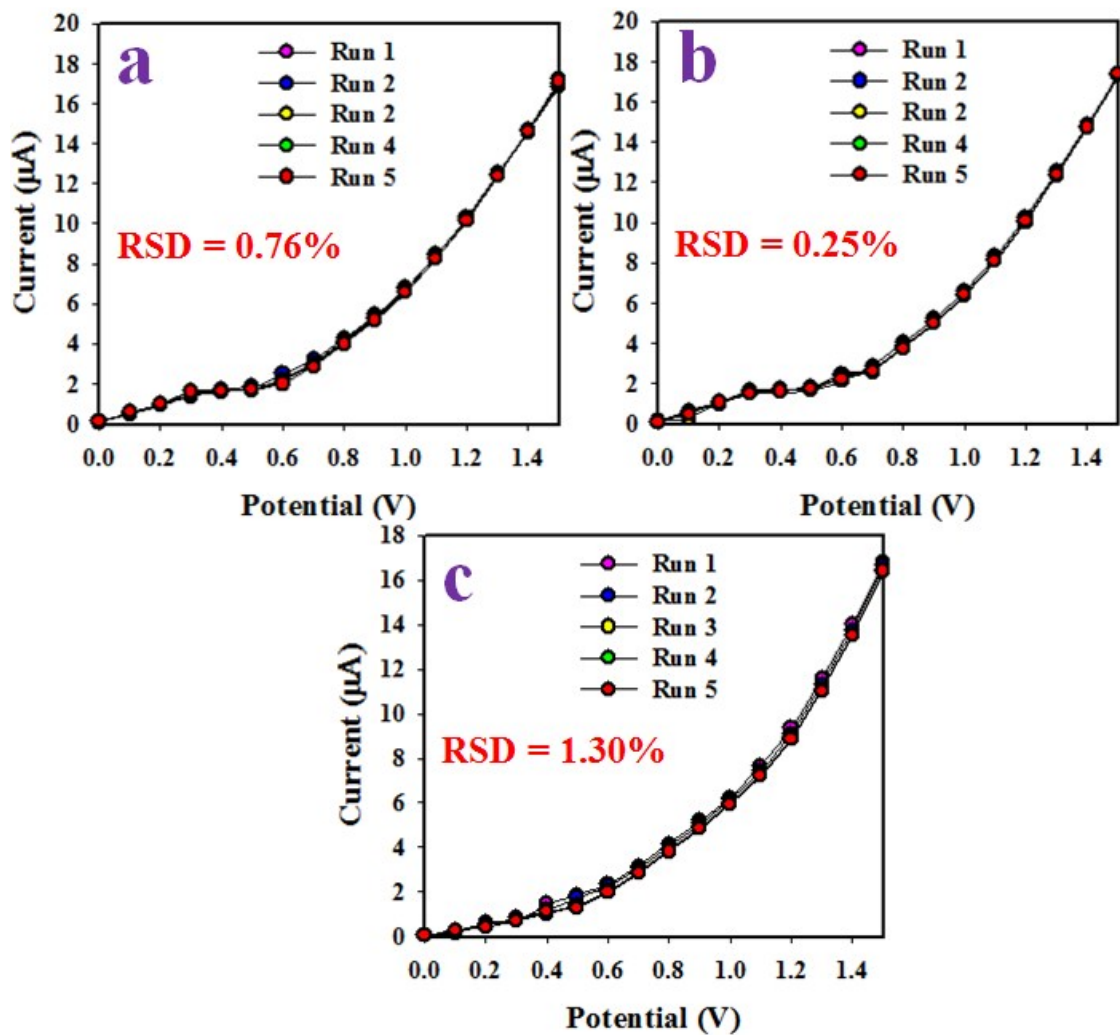

Figure S2. Reproducibility performances of 2-NP chemical sensor based on ZnO/RuO<sub>2</sub> NPs/binder/GCE in three different day (a) Day 1; (b) Day 2 and (c) Day 3.
